# Supplementary material for: Superhydrophobic copper stearate/copper oxide thin films by a simple one-step electrochemical process and their corrosion resistance properties
Source: Royal Society of Chemistry journal article supplement (doi:10.1039/c6ra01944g), 2016-01-01

## EIS

The graphs of original data and corresponding fitting line obtained from ZView2 software for chemically cleaned aluminum as well as superhydrophobic film fabricated from a Cu/SA solution with molar ratio of 0.5, respectively, were given below.

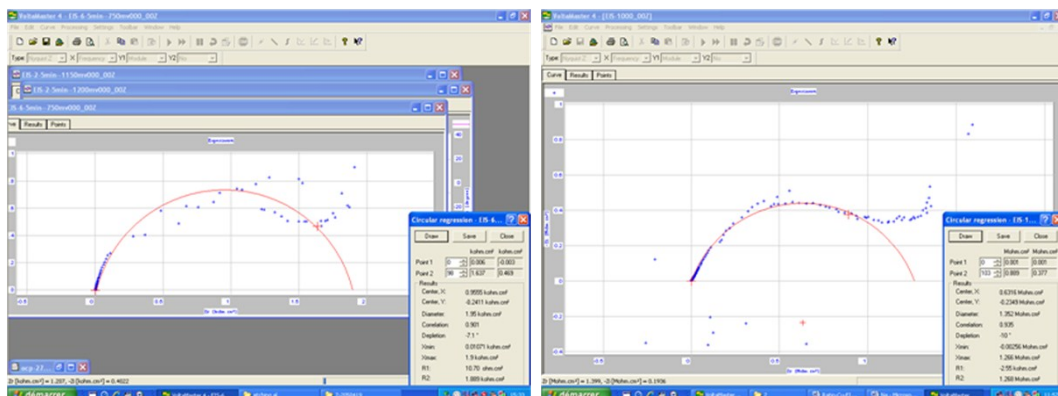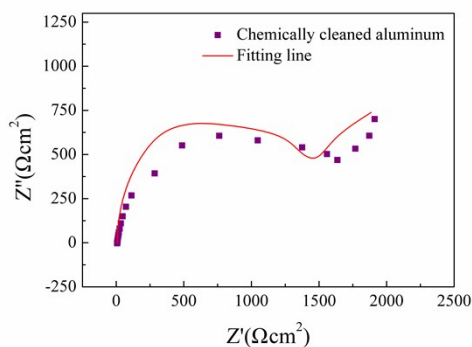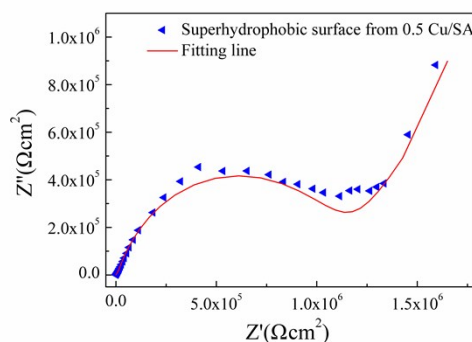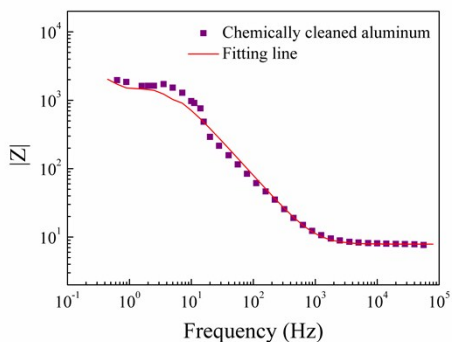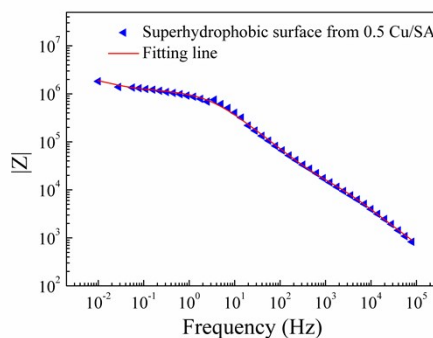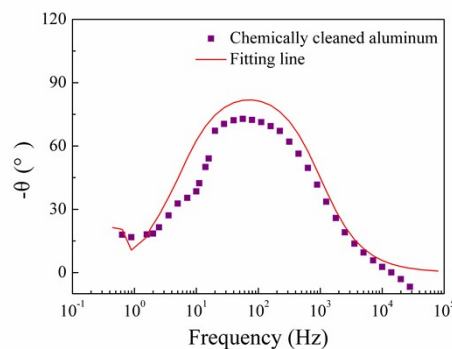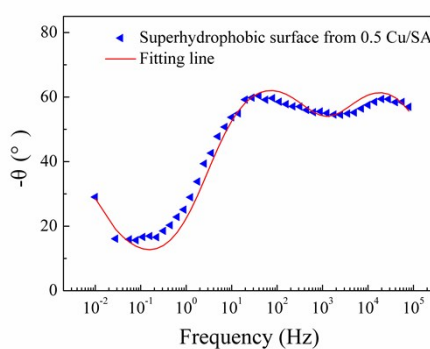

Supplement: c6ra01944g1.pdf [file c6ra01944g1.pdf]
